# Supplementary material for: Mycoplasma pneumoniae Community Acquired Respiratory Distress Syndrome toxin expression reveals growth phase and infection-dependent regulation
Source: PubMed Central journal article supplement (PMC2883071; doi:10.1111/j.1365-2958.2010.07092.x), 2010-03-03
Supplement: mmi0076-1127-SD1.pdf [file mmi0076-1127-SD1.pdf]

**Fig. S1**

1 TACGTAACGCGTAAAGAGTTCAACGAGTACAAAGACTCAAACGACCAACGACTTACAAAG  
61 ATTGAAAATAAGGTCGATAAGCTTGAAATTTAAAGTTGATAAGCTAGAGAAGAAAGTCGAT  
121 AAGCTGGAAGTTAAGGTTGATAAACTAGTCGAAACTGTTAATGCTCAAGGAGAAGATCTT  
181 AACAACTTCAAAGTTGAAGTGAGAGGAACACTTCAAAGCCAAGGCGAAACCCGCAATTA  
241 ATTTTGC AAACGCTACAAGGCATGAGTAAGCGGCTTGATTCTGTTGAAGGACGTTTAGAC  
301 TCTATGGATGGTCGTCGATTCAATGGAAACTCGTTTGGACAAAATCGATCCGCTAAAA  
361 TAGTCTTAGGCTAAATAACAAAAGTGCCAGCAATTAATCTATAAAGGTTAGTCGCTGGTAT  
421 TTTTCAATTTATTTGAAATAAAATAAAAAAGCCATCCTATCAAGGAGAAAGACAGACAGCTAA  
481 TGAATTGAAATCAATTACTTAAATTAATAATTTCCAAGTAAATGAAGAGATTAATATCTGAT  
541 GAATAGCCTTCTGTATTATTAGCAAAGGTACTTTAAAAATTTGTTACACTTTTTTCTACTA  
601 ACATCATCTTTGCTTTTAAATGAAAAGCTAAGTGAAGCGCTAAACTCAATTCACCTCTAAA  
661 TTTCTTGTAATTTCTTTTCCATTAACTTTAATTTTTTCTTCTTTAGTAAAGAAATTTTTCT  
721 GTAGTAAATTTGTTTTCTGGATCAGAAATTAGATTTAATTTTAGGGAAAAGATCAAAAATA  
781 TGCCTTGTACCCTTTCTTAGCAGTGAATCACCTGAAGAATAATCTCCAAACCAATTTAAAG  
841 GTATAGCTCAACTTAGCTTCAATTGACAAAATCCTTAAAACTTTGGTATGTCATCTGGAAA  
901 TATTCAACTTTTCGCTCCATCGTAAAAGGATCCTTGCTTGCGGGATAAAATACATCGTCA  
961 AAATCAAAATCTGGAATACCTAATTCGCCCCTTTTCCGCACCTTTGTTTTTCAGGCGTCTAAC  
1021 AACAAATTTTGTGTATCTTTTCGATTAACTTTGTAAAGACTTCTTTAGAGAAGTTATCATG  
1081 TTTTTTTTGCCTTCTGTAGTTTTTAATGCTTTTATACACATCAATGTCTTTACCGGTGGCT  
1141 TCTTTAATAAGATTTCTAAGATCTGCTTGGATACCAGTACAGGCGCTTAAAACTGTTCCA  
1201 CATAACAAAAATAAAGAACC AAAGGAAACCTTTGACAAAACTTCTTTTTGCGCATCAAC  
1261 AGTAAAAATAACTCTTTAATTTTGCCTTTTTTTGTAAAAAGCCTTTTTGGGATAAGAACTT  
1321 GAATTTGGAATTTTCGGGTTGAACATTAATTA AAAACACTGAAATTTCCAATCATTTATTAAC  
1381 AACATCTACTGATAAAGTTTTGATCTGAGTAGTTCTAATAAATGCTAATTTGTTGGCAT  
1441 TTTTATTCATTTAATGCTTTCTAAAACTTTTTTGC AATTTTGTGGCACTTCTCAATAAG  
1501 TCGGTCAATTTATTTAGTGAAGAGCAAATGCAAATCTTTAATTTTTTGAATTGATCAGC  
1561 AAAGCGTCTGATCCCTGTTGGCAACCGAGTTGCAAGTGTAGTTATTTTTTAAAAAATCA  
1621 AAAGAAAAAGAAAGGAACATTTAAACATGAAAAAAGTTAAAGCATTAAGGAATCTTTTT  
1681 CTAGAAAAAGCCAATGAAAACTTTAATACCCCAAATTTGCTTCAATGGTAGCTTACTTTT  
1741 GATCCAAAGGAAGACGGTACTTTGTGAATTCATTATGAAAAATAAAACTGTAATGAAGTT  
1801 GCTGACACTGAGATAACAAATAAGGAAAAGCCTTTAGGCACCTGAAAAGAGTTAGTTAACT  
1861 TTTTGGTCTAAAAAGACATAAAATTTACCAACGGTAAGTGTAAAACTTGTCTGTTGGTATT  
1921 TTTATTTCCCCACGCTCACCAGTTTTAGTACCGGTTCAACCTCGCGGGTCCGGTGCTC  
1981 GACCAGTGTGTGATTATGTGCCCTGGATTGGGAATGGGCACAGGTATGGGAATAACCAC  
2041 CGGGGCTGGATGATATAACCGCGCTTAAAACCGGCGCGGGTCTCCAGCGGAATAGT  
2101 ACGAACACAAGTGGTTTCGCGTTCCCTTTCTCCCGAGTTCTCGAATGTTCGCGGTTGGCCTC  
2161 AAAGCGAATGTCCAGGGCACCTGGGTGGCAGTACAGACGACACTACGGGAAAAGATAAT  
2221 CCCAAATGACCCACCCTCGACCCAGCCAACCTCCAGCTCTGAACGGGGGCGGGGTGAAGG  
2281 AATGATAAGGCTTCAAACAAAAGTGACGAAAACACACCACCTTTAAAAGCGCTACG  
2341 GGCAGTGGCCAGCAGGGTGGTCTACAACGGGTGGTTCAGCGGGCAATCCCGGCTCGTTA  
2401 AAGCAGGATAAGATTAGTAAATCAGGTCAGAACTTAACCACGCAGGACGGCGCGCCCCAG  
2461 TCTAATTCGACGACGGAATCCGCGTCGAATTTATGATCACCTCCCCCAACCTCACCCCCA  
2521 CATCCGATTTACCGAACGCGCTGTCATTCACCAACAAGAACAACGCGCAGCGCGCCAGC  
2581 TCTTCTCCGCGGCTTGTGTTGGGCAGCATCCCGGTGTTGGTGAATCGAAGTGGGTGATG  
2641 ATTTCAAACAAATTTCAAAGCCACCGACCAAAAATGGTCTTACACCGACTTAAAGTCGGACC  
2701 AAACCAAGCTCAACCTCCCCGCTTATGGTGAAGTGAATGGGTTGTTGAATCCGGCGTTGG  
2761 TGGAAACCTATTTTTGGGACGACGCGAGCGGGTGGCTCGGGTCCAACACGACCAGTTTAC  
2821 CCGGTATCGGTTTTAAAAATTTCCGAAACAAAATAATGATTCTGAAGGCTGTGCTGATCACC  
2881 CCGGGTTGGCTTGAACGCCGCAAGACGTTGGTAACCTCGTTGTGTCAGTGGTACCAGCTTGA  
2941 GCTTCCAGTTGGGCGGGTGGCTGGTCACTTTCACGGACTTTTGTCAAACCCCGCGCGGGTT  
3001 ACCTCGGGCTCCAGTTAACGGGCTTGGATGCAAGTGTATGCGACGACGCGCGCCCTCATTT  
3061 GGGCAAGCAGCCCTGAGCGGCTTTTCGTGGCAGTTGGGTCAACCGCTTGGGCCGGGTCCG  
3121 AGAGTGTGTGGGATTTAAAGGGGGTGTGACAAGATCAAGCTCAGGCGGCCGCGCAAGCAG  
3181 CTACCACCACCGCCGAACAGGGGACGCCCTTACCGGAGCACCCCAATGCCCTCGCGTACC

3241 AAATTAGCTCCACCGACAAGGATTTCGTACAAGGCTTCCACTCAAAGCTCCGGTCAAACCA  
3301 ATTCCCAAAACACCTCCCCCTACCTCCATTTGATTAAACCTAAGAAAAGTCGAAAAACACGA  
3361 CCCAACTCGACCAGGGCTTAAAAACCTGTTGGACCCCAACCAGGTTTCGCACCAAGCTGCG  
3421 CCAAAGCTTTGGTACAGACCAATTCACCCAAGCCAAACCCCAATCCCTCAAAAAACCAC  
3481 ACCGGTGTGGGACGAATAGTGGTAACATTGGCAGTGTGCTTAGTGGTGGGGGTGCTGG  
3541 AGGAGCAGACAGCACCAATTCGGTGGACCTCTCCCCGTTGAACGGGTGAGTGGGTGGCT  
3601 TGTGGGGCAATTACCCAGTGGGGTGGGGGGAATAGTAGTGAGGATATTAAGTGTGCA  
3661 AGACACTCCATTTATGATCTGTATTCATTAGTATATTCCTTTTAAATTTGTTCCCTCACT  
3721 TTATTCATATGAACCACCGCTCCCTCGCGACGGGACTCACCGTAGTGGGACACTTACA  
3781 AGTACCACCACGACGCTCAAGCGCCAGCAATTTAGCTACACCCGCTGACGAGGTGCGG  
3841 CTGCGCCACACCAATGCCATCAACCCGCGCTTAACCCCGTGAACGTATCGTAACACGAGC  
3901 TTTTCGTCCCTCCCCCTCACGGGTGAAAACCCCGGGCGTGGGCTTAGTGCAGCAAC  
3961 ACCGCCAAGGGCATCACTGCCGGCAGTGGCAGTCAACAAACCACGTATGATCCCACCCGA  
4021 ACCGAAGCGGCTTTGACCACCGCCACCACCTTTGCGTTACGCCGATACGACCTCGCCGGG  
4081 CGTTGTACGACCTCGACTTTTCGAAGTTAAACCCGCAAACGCCACGCGGACCAAACCG  
4141 GGCAGATCACCTTTAACCCCTTTGGCGGCTTTGGTTTGTAGTGGGGTGCACCCCAACAGT  
4201 GAAACGAGGTCAAAAAAAGGTCCCGTCGAGGTGGCGCAAGACCCCTCCAATCCCTACC  
4261 GTTTTGCCGTTTTTACTCGTCCCGCGCAGCGTGGTGTACTATGAGCAGTTGCAAAGGGGT  
4321 TGGGCTTACCACAGCAGCGAACCAGAAATGGTCAAAATACCTCCACCACCGGGCAATGT  
4381 TTGGCTTGAAGGTGAAGAACGCCGAGGCGGACACCGCAAGAGCAATGAAAACTCCAGG  
4441 GCGCTGAGGCCACTGGTTCTTCAACCACATCTGGATCTGGCCAATCCACCCAACGTGGGG  
4501 TTCGTACAGGGACACCAAAGTCAAGGCGTTGCAGGTGGCGGTGAAAAAGAAATCGGACTC  
4561 GGAGGACAATGGTACAGATCGAACTTGAACCAACAACCTCGCCAACGCCCCGATTTAAACG  
4621 GGGCTCCAATAACAACCAGCAAGTCCAACCTCAAGGCGGACGATTTTGGTACTGCCCTTC  
4681 CAGTTCGGGATCAGGCACCCAAGATGGCACCCCAACCCCTGAACGCGGTGGTTAACGAC  
4741 TGAGCAAATTCACAACGACCCCGCAAATTCGCCGCTCGATCCTCATTCTGTACGATGC  
4801 GCCTTATGCGCGCAACCGTACCGTCATTGACCGGTTGATCACTTGGATCCCAAGGTGAT  
4861 GGTGGATAAATTACTGTTAAACAATTTTTTTAGAAAAAGGCAGTTTTTTGAAGTTTTTAATTT  
4921 GTAATAATTTCAATTTTTTAAAAATGCCAAATCCTGTTAGATTTGTTTACCCTGTTGATTTG  
4981 AGAAGCCCTGAAGAAATTTTTGAACATGGCTTTTCAACTTTAGGTGATGTGAGAAATTTT  
5041 TTTGAACACATTTCTCTCCACTAATTTTTGGTGAAGCTAATTTTTTCCACTTCAGAAACA  
5101 CCCACAGCAGCTATTTCGCTTCTTTGGTAGCTGGTTACGGGAATATGTACCAGAGCACCCC  
5161 AGAAGGGCTTACTTTATATGAAATTCGTGCCGACCAACACTTTTTACAATGCCCGCGCCACT  
5221 GGGGAGAACTTGTTAGATTTAATGCGTCAAAGACAAGTAGTATTTGACTCTGGTGATCGA  
5281 GAAATGGCACAAATGGGAATTAGAGCTTTACGCACCTTCCCTTTCGCTATCAACGTGAATGG  
5341 TTTACCGATGGTCCAATTCAGCAGCTAATGTCCGTAGTGTGACTAGTAGATGCTGTT  
5401 CCCGTTGAACCTGGTCACTGCTCACCACCCGGCTGGTTCGTTGTAGAGACTACTAGAATT  
5461 AATGAACCGGAAATGCACAACCTCATTATCAAGAGCTGCAAACCAAGCCAATGATCAA  
5521 CCATGATTGCCAACACCAGGAATAGCTACTCCTGTACATTTATCAATTCCCAAGCAGCT  
5581 TCCGTTGCTGATGTTTTCGGAAGTACTTCCGCTTCGCTATCGTTTTGCGTGCCCTGATTGA  
5641 AGTCCACCTTCTAGTAATGGTGAATAATCCGCTAGACAAATGCATTGCGGAAAAGATTGAT  
5701 AACTATAACCTACAATCCTTACCACAGTACGCTAGCAGTGTAAAGGAACTGGAAGATACA  
5761 CCAGTATACCTAAGGGGAATTAACCGCAAAAAACCTTTATGTTACAAGCAGATCCGCAA  
5821 AATAACAATGCTTTTTTGGTTCGAAGTAAACCCCAAACAAAAGTCCAGCTTTCCCAAACC  
5881 ATCTTCTTTTTGGGATGTTTATCAACGAAATTTGTCTCAAGGATTTAACTGGTGCACAAATC  
5941 AGTCTTTTCGCTTACTGCCCTTTACTACTCAGTATGCTGGTCAAGTCAAAGTGCACCTTAGT  
6001 GTTAGCGCGTTAATGCCGTGAACCAAAAGTGAATAATGACACCGCAAGACAGTGAATA  
6061 ACTCAGTTTTCGGGTCTCCTCTGAACGTTTAGGTCAAACCTGAAAAATGGCTTGTCTGAAAT  
6121 ACCAAGAGTGGTGGTTTCAACACAGCATTTGTATGTATGCTCCTTTGAAAAATCCCACTAGT  
6181 GATTTGGAAGAATTACAAATAATTTGTGATGAATGTACTACCCATGCGCAGTTTTGTTACT  
6241 ATGCGTGCAGCTAGCACCTTCTTTGTTGATGTTTACGCTAGGCTGGTATTGAAGGGGTTAT  
6301 TACTATAACCCACAATTAAGTGGTTGATCTTATCAGATGAAAAACCCAGATGGACAGATA  
6361 TTCATATGATCAAAAACTTCGAAAACTTCCCTTGTCCAGGACAACCAAAACGTGTTCTTT  
6421 CTCCATAATAAACTCAACAAAACAACTGGTTACAGCTGGGATTGAGTAGAATGGCTAAAA  
6481 CATGACATGAATGAGGACAAAGACGAAAACTTTTAAATGGTACTTTTTCGCGTGATGACCTT  
6541 ACCATTCCTTCCGTTGAAGGGCTTAACTTCCGCCACATTCGCTGTTACGCTGACAACCAG  
6601 CAGTTAAAGGTGATCATAAGCGGTTACGTTGGGGCGGTTGGTACTCCACTTACGATAAA

6661 GTTCAAAGTAATGTCGAAGATAAGATTTTTGGTCAAAGATGGTTTTGATCGCTTTTAGCGA  
6721 TTAAGCTTTAACGTCACGTGTTTTGCTCTAATGTTAGAAAGCAAAGATCTTGTGACAAACT  
6781 CGTTGCGCTTGGCGTAACGACGTACTACTAAATAAGTTACAGCACCAGCAGCTACTACAC  
6841 TAGCTATAGCAGCCACAGTTAAACCAGCTACCAACGGATCTACGTGGGTTAAGAAAGTTGA  
6901 AACTGCCACCATTTGCATTCAATTC AACGGTAAAGCCATCTAGTGATCTTTCACCTTGAA  
6961 CTAGTTGTTGGCTAGACAAATGAGCGTGGTTTTGAAGAGGTCAAATGAACCATTAGCACCAA  
7021 CTTGGTTTTTCGTACTTAACTTGTAAAGAACTCCTTCAATTTGCTTTTGGGAGGTACTTTGAA  
7081 TTGGTGCATAAGCATCATTAATAAAATGAGCTGTCCGGTAAACAATGCCCTACAATCATGT  
7141 TGTACTCATAACGGATTGAGTCCAGAGAAAACAAACACAAGTGTTTTTCTGCTCCTTATTAT  
7201 TTCCCACACTTCTATTTTTCTATTTTTGTAAAGAAATATCAACCGTAGTGCTTTGGTTTTGGGT  
7261 TGAATGCATTTCTAGTTAAGGCAATTTCTAGATTACCACCTTCCAGCATTATTTGTCAGTTT  
7321 GGGCACCGCCATCATTACCATAACTGTGTAAAGATTGTGCTTCCCTGTGCCAATTTGTTGA  
7381 CATCATTTTTGGGTCATTTCAAACCTAAAGAGCCATTTTTGTTCAAGCGAGAAGTCGGCTTTTA  
7441 AGTCTAGCTTGATGCCATCCTTTTTCAACATCAAACCTTAAATTTCTGCTCCTTTAAGAAAACCT  
7501 TCTTGTTAGTTAGTCTCTCTACATAACCAACCACCGCACCTAGCAGCTTGACTTAAAA  
7561 CACCACGTTTTAGAACTCTCGTTGGACTTCAAGAAGTGCGCTACGATCTCTCTGTTTTTGG  
7621 TTGAAAGAGAAGTGGTTGTTTTGGAAGAAGTTTTGCGGTAATTTTTCCCTTCAATCAC TAG  
7681 TGTGAAATACAGTTTTAGATTTTTGTCTTGTGCTTGAATTACAGCGTCCCTTGAGGCATTAT  
7741 CGACGTATATACCGTTGTTGTGCGAACCTAAGTGCATCGAGTGAGTAGAACTTATCCTTTG  
7801 TTTCAAAACGGATAAATGTAAGTACTTTGCGCGTCTTGTCTAAACCTTCTAGGTAATAGA  
7861 AATAGTTTTCTAGGTTAGCAATACGACGTTGGTTACCAAGGTTGTTAGCGTTAGTTACAT  
7921 CTACTACCACATAGAAGTGACCAATTTGCTTTTCAATTTCCGTTCAAGTTAATATTGTTCTTAG  
7981 TTTGAAAGTTTTGTCAGTGCAGTTTTGAGTTGAGTATCTTTAGTATCAGTGCTGCCTAAAA  
8041 CATCTTGAACTTTTGCGTACGTTATCAAAGTCGAGGTTAGTGCTAATACCCTTGCCTGGTAA  
8101 GGTAAATCGTTAATGCTCTTGTGAAACTCTTGTCTCATCAATTTACGTAACCTGATCATTTTT  
8161 GTGCTTTTTCAAACAATACTTCTTGTCTGTAAGTTTTGCCCGTTCTCAACTAGCACTTTTGGA  
8221 AATCTCTTCTTTCAGTTAATATCTGAAGACTAGCTTGTGTTGCTTCTTCTTAAAGTAGTGTT  
8281 TTAGCTACAGATAACAACCTTATCTTCTTTCACCTTCCAAGCGATCAAGGAAGTCATTATCA  
8341 CGTCAGCCACCATCTGAAAACCAATTGCAATTAACAATAAATTTAGCTTTGTTTTTCGTTT  
8401 GCTAAAGCATTTAGCTTGGTCTTCTATTGTTTTTCAATTTGCTAAGAACTGGAAGTTTTGTCC  
8461 ATCCCACACTTTAACTTCCCTTAGTTACTTTTTTGTCTTAGGGTAAACGTTAGCGTAAATGGC  
8521 CATGGAAAAGTAAGAAGCTACTAACTTTAAGAATTGATCTCAGTCCCTTCGGTTCTTGGTT  
8581 TAAATTAAGACCTAATTCCTTATTTGCTTCTTGATAACCACTTAACTCAACCGGTTGAGTT  
8641 AATTTGGAGTACTTACTTTTATTTGGTATCTTTATCTAGGCTACTAATGTATTTCTTTTACCTT  
8701 TAGGTAATCAACTTGCCTTGTTTTTAATTTGCGTTAAAACGCTGTTAATGCCAGCTTTTTTC  
8761 ACTTTTCGTTACTTTTTGCTCTCTAAACGTTGTTCTAAATCCTTTACTTGTTCAGAAAGGTT  
8821 GTAAACGTTAGTGATTGCATTAACAAAACTGGATTTAAAACAAAATCTAAGGTAGGTGC  
8881 TTGAGTTAAAACACCGTTTTCTAGTTGAAATTTAGATTAGCGTTTTGTTTTAGGGATCAACAG  
8941 CTTATCTAAGTTAAAGTTTTTTGTAACGGACAAAACCTAAAGCTTTGGTTTTGTAGTTTTGTA  
9001 ATTTCTGTTTTCAAACCTAAAGTTAGTTCCAGTGGTGTAGTGTCATCACCTCTTTTAC  
9061 TGCACCTACCTAACCCAACATTTAGAGTTTTATCCTTTCGCTACGTATGCTTTAAGTTGACT  
9121 TTTAGCTGCACCTTTGATAGTTGGCCTGTGTACTCTTAGCGTTAGCAATAAAGTCAGCTGT  
9181 TTTTATCGATTGCTGCTGACCATTGCTGTCCGGTGTAAAAAGCTTGGTTCAAGGATCTAA  
9241 CTTAAACAAAAGAAAGTAATGCCGTGATTAGTAAAGCTCTTTAAAGGACGGTTCGGAATAATG  
9301 AATTTGTTGCAGGGTAATCTAATGGATCACGTTTAGCACCTAAGAAAAGTGGTTTTCAAAGTT  
9361 TACGTTAGGTTTTTCAATGAAGTTACGATCTTTGTTTTGCAAGTCACTAGTTTTCTAGTAGT  
9421 TGTA AAAACAGATTGACGGAACCATAAGAATACTCCTTTCTCTGAGTGGAGGTTGTTGAC  
9481 GTTTTGTAAACAGTTTTTCTTTAATGCTTACCCCAAACGGTTTTTGGAAAGTTTTCGTTTTGTTGC  
9541 TGGGTCAGATTTTTTTTTAAATCTGCTTACGCGTGAAGTTACCCCTTTCAATGAGCCTAT  
9601 CTTTTGGTGGGCAAAGTCAAGGTCAAACCAAGCAGTTTCTCTCCATCGATCATCAATGGT  
9661 TCCAGCTTTTTTTTTGACCCCGGTAGTGGGTTTTTGTAAACTTTGAACCTTATCATACCCCTGC  
9721 TCGGTATTTTTGTTTCATGTGCGAAACGGCGATTTCCAACCGTTATTTAATTAACAGTGCCAC  
9781 TAAACCAAACCTCATATCTGACTTAGTTTTAGATGTTTACTTCTTTTTATTTCCGGAAACTT  
9841 GTTACTTAATTTAGAAAAGGAAGATCCACCAACAAGCCAACCAAACAGCGAGTCCAGC  
9901 ACACAACAGCAACGAATAAATTTTCGTAAACGTTTTATCCTCATACGTGTAATTTTATAACA  
9961 AAAAAACGCCCTTTGGGGAACGTTTTTAAACAAGTTTAAATTTAGTCAATTTTTATTGAA  
10021 TATTAATCTTTCATTTATTTAATGCTTAAAGATTAATTAACTTTTGCACTTGTCTAAGAA

10081 GTCCATTTTGGACAAAGAAAAATCCCAAAAGGATGGCAATAAAGCTCACGCTTTTGGGATC  
10141 TTCCTTGTGGTTTAAACCATTTTTTTTAGCTAAGTCTACTTAACTTTTCTTGCTTTGAGCA  
10201 TTTGTTCTCAGAAGTGCTTACGACTCTTACGTCAGCGGTGTAAGACAACCCACTAGCTA  
10261 TTATTGTTGAAAGTAATGCAGCACTACCAGTAAAAGTAAATGCTATTTAATGGTCAGTTAA  
10321 TCTTATTGATGCTTCTTTTATTGAAAATGTTTTTGTGTAGATCAAAGGTGAAGTTATCAA  
10381 TTTGTTTTTGGTTATTTGCCAATTGTACCTTGGTCAATAAAGGTAGTTGACCAGTCTTAA  
10441 TTGGTGCCTGGTATTTGTGTTCTAAAACGGTTTTGAGCTGCTTTCTAAAATCTGTTTTGCA  
10501 ATGGAGCGTAGGCATTCCTAATAAAGGAGCTGTCGGTAAACAACAGACTAACAACTGTGT  
10561 TGTATTCGAAGTTGTTTTAGGTTAGAGAAGTCAAACACCAAGTTTTTCTGCTCTCTAACCG  
10621 TACCATCCTTGTAGTTTTGGATTTCTTGGTAACAATCCAGTAAGGCAGTTTAAATAACGG  
10681 TACTTTGTTCAAGGTTGGTGGTTAAAGTAATCTTGAAGATGTTTTTGTCTGATTCTGGAT  
10741 CATCACCTTTTTCTTCTGAAACCAAGACATTTGTAACCTTAGCTTCTTCTACAATTTGGT  
10801 TAAATTACACTTGGGTCTTTAACCTCTAAAATTACCCTTCTTGTCTAAGGTAAAAGTTGATG  
10861 TTAACCGTAGCTTTAAATTTATTTTTGTCTTCCCTTATTAAAGCTCACCCTTTCTTTAAAA  
10921 AGAGCTTTTTTACCAGTCATTCGCTCAACATAGCCTAAGATCGAACCACTGACATTTTTCAC  
10981 TCAAAAAACCCCTCATCATTCTCAGCGTTAGGTGTAGATAGTTTAGCTGAATTTGTCAGCAC  
11041 TTGCTGTAGGCAAAGTAAGTTCAGCGTTGGTGAGGTTAGCCTTCAAAGCAGCGTTCCAGT  
11101 TATGAGTATCGAGATAAAGGTTTTGGTTTTGCTTGGCTTGGATAAATGCATCCTTGGACA  
11161 CATTTTTTACATAAAGGCCACGACTATCAACCGCTAGTGATTTCGAGTGAATACAGCTTTT  
11221 GTTTTTTTTCAAAGCGCACTAAGTACGAACTTTTGTGCTCCTTTGTCCAACCTTCAATAT  
11281 AGTAAAAGTAACTCTTAGCGTTATTTGCCCGGCGTTGGTTACCCAAGTCATTGGCATTAG  
11341 TTACATCCACTACTACATAAAACTGACCAGTGTATGGGTTAGATCGTAGGTTTAAACCAT  
11401 ACTTGTTTGCCGTACTTTGAACGCTAGCGAGCTTCCGGATCATCACTTTTTGCGGGCGTTTA  
11461 ACATCGCATCAACTTTTATGAACAGCATTTACTTTTAAATTTTCAAGTTTTCAGAGATGCCTTGTA  
11521 CCTTTAAATAGTTGTTAATGTCTTTTTGGAAGCGTTCGCGCTCATCGTTCAAATCAGTGC  
11581 TTTGTACTACAATACTCTTGGTTTTGTGAGTTTTGTTTTGTCCAGCTAGCTTGTTTAAAGT  
11641 TTTGTGCGTAATGGTACTTATAAGAAAATTTTCGTTGGCTGCTTTTTTCTATTTTGTAGCAT  
11701 CACCGTTAGCAATTTTAGTTTTACTACTCTTAGGGTTAGAGCTACCTTATTGATAAAAAC  
11761 TAGCATCACGTAAACCGCTTTCATCTTGA AAAACCAATGGCGCTTACAGCAATCTCAGCGC  
11821 GGTTTTTCAATTTGCTAGTTGTTCTGATTTTTTTTTCAGTGTTTTTCAATCGGGATGAACCAA  
11881 ACTTAGCACCATCCCAAACCTTCAATCCGCTTTTCCCTTTGCGCGTTTTAAATTTGACGTTAG  
11941 CAAAAATGTCCTTAGAGAAGTAAGAAGCAATTAAGCTGGAAAGTTGTGTTTCAAGTATTAA  
12001 CATCATCGTTCAAGTTTAAACCAAACCTCTTTTTTTAGCATCAGCATAACCATTTGTGCAGTAT  
12061 TTTTACCCTTGGATTCAATACTACCTGGATTTTTGGCTTCAATTTTTTCAAGCTTGCCAAATA  
12121 AATCAGCTACTTGAATGTAGTCAACTTCCCTTATTTTTTGAATTTGTTCTATAACCTTATTGA  
12181 TTGCTGCTTTTGTCACTTTTCAATTTGTAAGGTTGATCAGACTTTTAAATGCTCCTTTAAATCAA  
12241 GTGTTTTGCGCAAAACAGATTGTGAATGTTGACAAATGGCGTTTTGTCAAAAACGGGGTTAAAGT  
12301 CAAAGGACAGTGTGGTTGTTTGAACAAAACACCAATCTTAAATGCCGTAGCATCCTCGT  
12361 TGGTTTTTGGCACTAGTAACTTATCGAGCTTAAAGTTATTGTAAGTGTCAATGCTAAAGG  
12421 TCGAATCCTTAAAGTTTTGTACTTTTAGCTGTTGGTTGGAGGCTATATCACTCTTAGTGGTGT  
12481 AAGTTTTGACGTACAGCACTACCTAAACCTAAGTCAATACTGCGAGTTTTTCTAACAAGCG  
12541 TTTTAAATCTGGTTTTTTATTAACCCATTGGTAATTAGTCTTGGTACTCTTTGCTTTTTCTAA  
12601 TGTAATCACTTACAGTAATTAATCTTTCCGACCGTTTTTCCCTTGTAAAACAGCTTGCCTGT  
12661 AAGGTTCTAGCTTTAAAAAGAAGCGCGTGTGAGTGGTATGACTACCTCAATCAGGACTGT  
12721 GCCAATTTGGAGTTACCACCTTCAGAAGTGATGTTGGTGGTAAAAGGCATTGGGGTTATTGT  
12781 TGGTATCCCAAAAATCGGTAAAAAGCCACTGTTAGCCCAGCCCTTAGTACCCTTGGTGT  
12841 TAAAACAGTTTTGGTTGAACAGATGAAGATTCCCTTATCTGGATCTAACCGCTCAGCAC  
12901 GTAGAGAAATCTCGAGCGAATATCACCCATAAAGGTTTTTTTTATCCCAATTTCTGG  
12961 GAGTTGGTTCTGGAACACGCTTGTCAATATGATAATTCATCATTTTTCCACCACCACTATGC  
13021 GTTGGTTGGCATAACCCAAATCAAACCAAGCCACCCACTTTTCAAGTAATAAGGGTTACTTG  
13081 CTGTCCTTTTCCGCGTTAGAGTACTTGTAAATATGTTTGGTTCCAGCTAAAAGTGAACGTTTTT  
13141 TGTGCTATTTGTTCTCGTGCCGGAACGCTCAAGTGGGACCGTTATCAGTGTGTCAACCCA  
13201 CTAACCAAAGCTAGCGCCAGAGTTGGTATAACCTTTTACATCTGGTAGTTACCGTTCT  
13261 GAATGGAAAGCTGAGCAGTACGCTCAATTTGCTTAAAGTGTCTTCTGAGCGTAAAGGCTTT  
13321 CACTAATGTAGTTATTAACGTTGTTTAAAGTAGACCTCTGCTTTTTTACCCTTATTTCACT  
13381 TTAATCAAAGCGCTGGGTAATAGCTGGACTTTTACTCTTTAAGATTGAAAGCACATCGC  
13441 CTTTACCCTTAAAGGTAGCGCATGTGAACGCCACCATCGCTTGATAGTGTTCATTGTTAC

13501 TTTTAAACAACGCTAGTGAATGCTGAACTTGCAACGAATCAACCAAACTTCCTAATGCAA  
 13561 AACCAAAAAGTAAGAATCGGTACTGTAAACGTTTCATGCTTTATTCTAGCACTTTAAAAA  
 13621 TATTTTTGACAATCCTTCTGCGCGTGTATTAAAGCAAATGCTGAACGAAATGACAAAAG  
 13681 ACGCACGGTTTTGAACTCAAAAAGCTTTTTATGGCGTGGTATTTACCAAGCATTTCAATC  
 13741 ATTTTACCCTCTAAATGAAGAGTTACTTTGCTCTGCTTATCTCAATATAGTTAAAGTAAT  
 13801 GTGTATAAACGTAGCTAAAAATAAAAAACCAACTGAGAGCAGTTGGTTGGAATCAATAAT  
 13861 TTGGCGCGCCCAATAGGACTTGAACCCATAACCTTCTGGTCCGAAGCCAGACACTCTATC  
 13921 CAATTGAGCTATGGGCGCTTCTTATAGTTAATTCTATTAAATCTCTGAGAACTGCGCAAA  
 13981 TCTTTATTAAAAATTAGCTGACTTCAACACAGTCGCTCTAATACATGTCAAAGGATAAAAA  
 14041 AAATAAGGTTGAACAGCTTGAACCAGTAGACCTTTTTTGAGCGGACTAAGCTAGAGGACAC  
 14101 CCAAGTTTTAAATGATGTTGAACTAGATGACATCAAGAAACTAGAAGAGTTGAAAAAAGA  
 14161 ATTGGAACCAACCTTTTGATCCACGTACCAGAAATGAAAATTAAACGTGAAATCAAAGAGTT  
 14221 GGAACGTAAACTAAGAAGGAACCGTTAGTGAATGTTTGTAAACCTCCACACTAACTCTTA  
 14281 CTATAACTTCCCTCAACTCCACACTTTCCACCGCAAAAAGCTAGTTGACCTAGCTGTTCAAGA  
 14341 CCAACAGGTAGCTGTTTGTTTAACCGATCCCAACTTATTTGGTGTACTACCGAGTTTTTTTTT  
 14401 GGCCTGTCAAAAAGCGCACATTA AACCCCTTAATTTGGGTTGAGTGTACTGTTCGACATTA  
 14461 CGAACAAAACGTTAATTTACTAGTAATTGCCCAAACCAACCGGGTTATCAGAACCATAAT  
 14521 GTGCTTAGCGTTAGTTAAAGACCAACCAGATTTGCAATTAGAACCCTTTTTGGATGGTAA  
 14581 TGTGGTAATTTATTTGCACACAACTGAACTGCGCCTCAACACCGCAAACCCCGTTTACTTT  
 14641 AGCACATGGTTTGAGTGGTCGTTATCCTAAAAATTGCAGTAACACAAAAACCAGTTAAGTG  
 14701 TCAAAACACCAATAAGGACTTAACTGCTCTTAACTTAAAGCAAAATTAGTCAAAATTAA  
 14761 CAGCGAACACTTCCAGCCACTGGAATGAAAATTAAGCCGTAGTTTAAACGAAATCCAATT  
 14821 GGATCCACCAATTTGTGCAACAACTCCGGCACCAACCTTTTTTTAAGCCAAAAGGCAGCACA  
 14881 GCAAAATTTTAGCGAAGAGGAATTTGGGAAATCTGCAAAAAGCTAGTGGAGCAAAGTCAATG  
 14941 AGATTTAACC

1...363 (363 bp)

MPN368, partial  
hypothetical protein

495...1256 (762 bp)

MPN369  
conserved hypothetical protein

1897...4110 (2214 bp)

MPN370  
hypothetical protein

4153...4788 (636 bp)

MPN371  
hypothetical protein

4942...6717(1776 bp)

MPN372  
similarity to pertussin toxin subunit S1

6728...7342 (615 bp)

MPN373  
hypothetical protein

8302...9060 (759 bp)

MPN374  
hypothetical protein

9406...9795 (390 bp)

MPN375

hypothetical protein

10175...13597 (3423 bp)

MPN376

hypothetical protein

14024...14248 (225 bp)

MPN377

hypothetical protein

14252...14950 (699 bp)

MPN378, partial

DNA polymerase III alpha subunit

dnaE

**Table S1: Primers used for transcriptional analysis of *cards***

| Primer name                      | Primer sequence            | Note                       |                              |
|----------------------------------|----------------------------|----------------------------|------------------------------|
| <b>Primer extension</b>          |                            |                            |                              |
| MPN372PE                         | GCTGTGGGTGTTTCTGAAGTGGA    | 444484-444507 <sup>1</sup> | 144-167 <sup>2</sup>         |
| MPN372PE2                        | TCTCACATCACCTAAAGTTGA      | 444413-444433              | 73-93                        |
| MPN371PE                         | GCAAGTCCAACCTCAAGGCGGACGAT | 444038-444062              | 126-150                      |
| MPN373PE                         | CCGTAGTGCTTTGGTTTGGGTTGA   | 446639-446662              | 80-103                       |
| <b>Reverse transcription PCR</b> |                            |                            |                              |
| MPN371P                          | GTGCCATCTTGGGTGCCTGA       | 444090-444109              | 337 bp (79-415) <sup>3</sup> |
| MPN371M                          | GCAATGTTTGGCTTGAAGG        | 443773-443791              |                              |
| MPN372P <sup>4</sup>             | TTCCACTTCAGAAACACCCACAGC   | 444484-444507              | 556 bp (144-699)             |
| MPN372M <sup>4</sup>             | TCAATCAGGGCACGCAAACG       | 445020-445039              |                              |
| MPN373P                          | TCAACCCAAACCAAAGCACTACGG   | 446639-446662              | 401 bp (80-480)              |
| MPN373M                          | ACCAGCTACCAACGGATCTACGTGG  | 446262-446286              |                              |
| MPN393P <sup>4</sup>             | ACTGGTTCTGCCCTACCTTCCGTTCC | 471171-471196              | 456 bp (260-715)             |
| MPN393M <sup>4</sup>             | CTTCGTGCATTGCTTCGTAACCTCGC | 470741-470765              |                              |

<sup>1</sup> primer position within *M. pneumoniae* reference strain M129 genome

<sup>2</sup> primer position within corresponding gene

<sup>3</sup> size of the amplified fragment and its position within coding region

<sup>4</sup> primers used in quantitative real time RT-PCR

Chromosomal region of clinical isolate S1 used in this study, corresponding to nucleotides 439400 to 454348 of strain M129 complete genome was sequenced. The region contains identical coding regions, and only minor sequence differences were found. Sequence is provided in Fig. S1.

**Table S2: Primers used for generating gene regions used in macroarray**

| Gene         | Primer name | Primer sequence                | Position within M129 genome | Amplicon (bp)    | T <sub>a</sub> <sup>1</sup> (°C) |
|--------------|-------------|--------------------------------|-----------------------------|------------------|----------------------------------|
| <i>dnaJ1</i> | MPN002P     | AGCGGAGTATGACGCTATGCTGCGC      | 2008-2032                   | 496 <sup>2</sup> | 60                               |
|              | MPN002M     | TGTTGAGTTCGTACCACATTTGTCCAGGG  | 2476-2504                   | (171-667)        |                                  |
| <i>dnaJ2</i> | MPN021P     | TTGCCCTATGATTTAGAGATTGCG       | 26553-26576                 | 477              | 55                               |
|              | MPN021M     | ATTGGCTACTACATTATGGTCAACC      | 27005-27029                 | (394-870)        |                                  |
| <i>dnaJ3</i> | MPN119P     | AATAAGGCACCGGATGCGGC           | 152682-152701               | 590              | 57                               |
|              | MPN119M     | TAACCGTACTCAGGATTACCAATCATTGC  | 153243-153271               | (115-704)        |                                  |
| <i>grpE</i>  | MPN120P     | TTACCGAAATTCTCAGTTCCATCCG      | 155345-155369               | 554              | 55                               |
|              | MPN120M     | CGATACCTTACCACCGTATTAGCCG      | 155873-155898               | (23-576)         |                                  |
| <i>hrcA</i>  | MPN124P     | ACCCGACAAGCCCAAATTCTCAAGG      | 161746-161770               | 537              | 55                               |
|              | MPN124M     | GCGATCATTAAAGATCCTGACACATACC   | 161234-161261               | (16-552)         |                                  |
| <i>tig</i>   | MPN331P     | TTGATGCCATCTTCCAGCCG           | 389146-389165               | 540              | 55                               |
|              | MPN331M     | TGATCTCTAACTGCTTAATTGCTTTGAGC  | 389657-389685               | (224-763)        |                                  |
| <i>lon</i>   | MPN332P     | AGCGTTAGATAAGTTGTTGGAACGG      | 390705-390729               | 496              | 55                               |
|              | MPN332M     | TTTAATGTGCTCTGGATATGGG         | 391179-391200               | (378-873)        |                                  |
| <i>sigA</i>  | MPN352P     | AAGGAGAGTGATGTACCAAAGAAGCGTCG  | 420002-420030               | 456              | 57                               |
|              | MPN352M     | GGAAGAATCGAGCGAACCTAGAAAGAAACG | 419575-419604               | (211-666)        |                                  |
| <i>cards</i> | MPN372P     | TTCCACTTCAGAAACACCCACAGC       | 444484-444507               | 556              | 60                               |
|              | MPN372M     | TCAATCAGGGCACGCAAAACG          | 445020-445039               | (144-699)        |                                  |
| <i>pdhB</i>  | MPN392P     | GCTATGGCTGGTATTGGTGTGGGTGC     | 470140-470165               | 608              | 60                               |
|              | MPN392M     | GCCGCTTCGGTAACACTACGAGCAAGC    | 469558-469582               | (193-800)        |                                  |
| <i>pdhA</i>  | MPN393P     | ACTGGTTCTGCCCTACCTTCCGTTCC     | 471171-471196               | 456              | 57                               |
|              | MPN393M     | CTTCGTGCATTGCTTCGTAACCTCGC     | 470741-470765               | (260-715)        |                                  |
| <i>nox</i>   | MPN394P     | TTTGGGTTGTGGAATTGCCTTGG        | 472774-472796               | 557              | 57                               |
|              | MPN394M     | GGTTAATGCCCGCTTCTTCATGG        | 472240-472263               | (120-676)        |                                  |
| <i>gap</i>   | MPN430P     | TTAGCACACTTACTAAAGTACGACTCCGC  | 518687-518715               | 576              | 57                               |
|              | MPN430M     | AAGGGCCATACCGTTGAGCTTACC       | 518140-518163               | (136-711)        |                                  |
| <i>dnaK</i>  | MPN434P     | CTACCGCCGCTGCATTGGCTTATGG      | 523137-523161               | 447              | 60                               |
|              | MPN434M     | AAACATCCGAAATTGGGTTGCGAGTACG   | 522715-522742               | (464-910)        |                                  |
| <i>clpB</i>  | MPN531P     | AATTTATGAACCTTTCGTTGTCTGG      | 653657-653680               | 427              | 55                               |
|              | MPN531M     | CATTTCTACAGCAGCTACCAAGGC       | 653254-653277               | (270-696)        |                                  |
| <i>groEL</i> | MPN573P     | GCTGTATCTACCAATGATATTGCTGG     | 697070-697095               | 493              | 55                               |
|              | MPN573M     | TTTCCATGCTACCTTCTAGTAACGG      | 696603-696627               | (229-721)        |                                  |
| <i>groES</i> | MPN574P     | AGTGCCCAAGGGAAGTGTGCG          | 697541-697562               | 102              | 55                               |
|              | MPN574M     | AAAGTAGATCGTGTACCCGATGCC       | 697461-697484               | (115-216)        |                                  |
| <i>eno</i>   | MPN606P     | AACTACGCGATGGTGTATCCC          | 727353-727372               | 556              | 55                               |
|              | MPN606M     | GCTGCCTTAATTGCTTCGACC          | 726817-726837               | (173-728)        |                                  |
| <i>tuf</i>   | MPN665P     | TCGTTGGTTTACGTCCAATC           | 788573-788592               | 130              | 55                               |
|              | MPN665M     | TCCACTTCTTACGGTCCACA           | 788463-788483               | (734-863)        |                                  |
| <i>ftsH</i>  | MPN671P     | GCCTACTACCAATTATTATCTTTGTCA    | 795873-795899               | 523              | 55                               |
|              | MPN671M     | TTTAAGGTTTGTTCGACCACCG         | 795377-795398               | (533-1055)       |                                  |
| <i>recA</i>  | MPN490P     | TCGGCACTGGTGGTTTGCCACTAGG      | 597651-597675               | 517              | 60                               |
|              | MPN490M     | ATCCGCATCGAAGCGTAGAACTTCAACG   | 597159-597186               | (152-668)        |                                  |
| <i>P1</i>    | MPN141P     | TATGATCCCACCCGAACCGAAGC        | 181188-181210               | 653              | 60                               |
|              | MPN141M     | TTGAGTTGGACGGACTGACCCG         | 181819-181840               | (331-983)        |                                  |
| <i>orf6</i>  | MPN142P     | TCCGGGTCTAACTCCCAAGACTTCCG     | 186122-186146               | 606              | 60                               |
|              | MPN142M     | ACTGACAGGTGCTGATCTCAAGAGCG     | 186702-186727               | (376-981)        |                                  |
| <i>P30</i>   | MPN453P     | GCAGAAGAGGATACAGTACAAATTCAGGG  | 553325-553353               | 622              | 60                               |
|              | MPN453M     | CAGGACGTGGTGGTTGCATTCC         | 552732-552753               | (166-787)        |                                  |

<sup>1</sup> annealing temperature used in PCR.

<sup>2</sup> size of the amplified fragment and its position within the coding region



**Fig. S2**

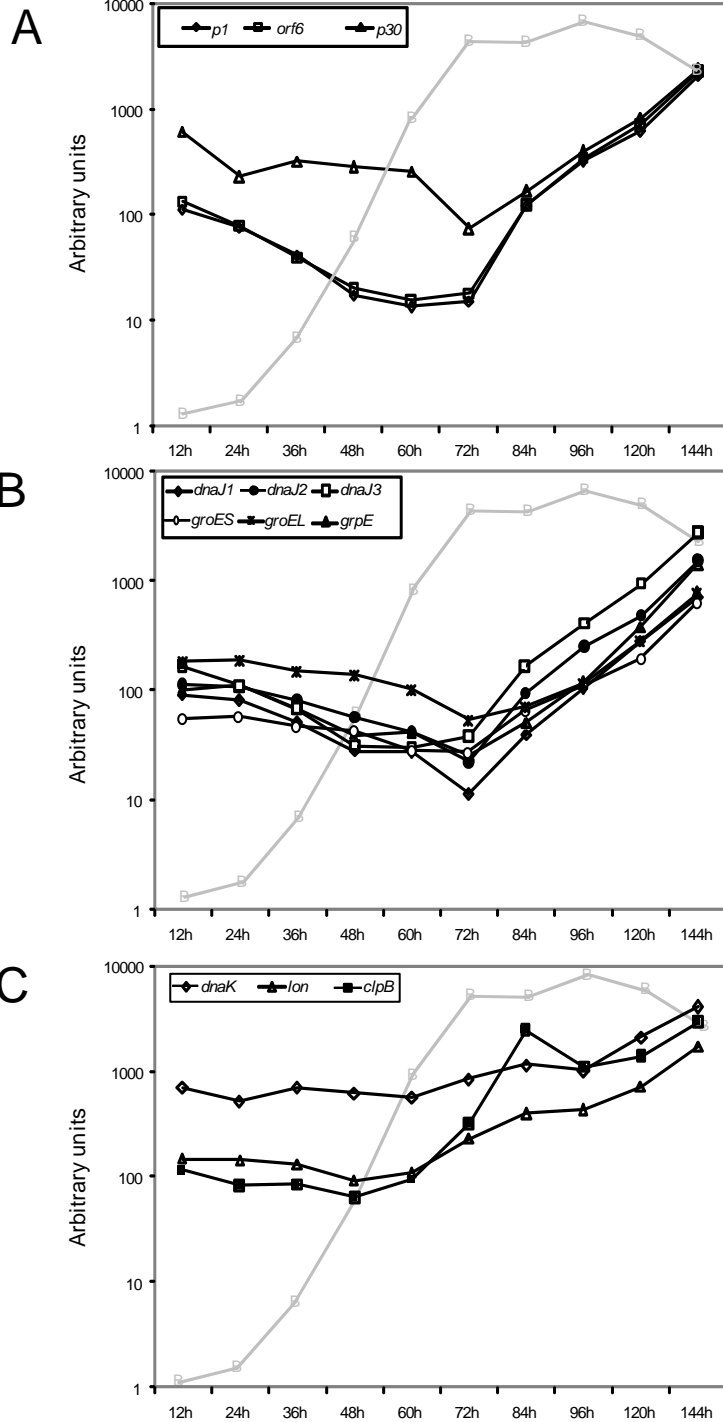

Growth phase-dependent variations in adherence (A) and heat-shock (B & C) related genes mRNA in *M. pneumoniae* SP-4 broth cultures. *M. pneumoniae* cells were grown at 37°C for 12, 24, 36, 48, 60, 72, 84, 96 and 120 h and harvested at each time interval for analysis. Experiments were repeated two times. Levels of each transcript are estimated by DNA slot blot (average value  $\pm$  SD), and mycoplasma growth (total protein) are indicated in grey lines, and expression levels are presented in arbitrary values.
